# Supplementary material for: Transgenerational effects enhance specific immune response in a wild passerine
Source: PeerJ. 2016 Mar 31;4:e1766. doi: 10.7717/peerj.1766 (PMC4824879; doi:10.7717/peerj.1766)
Supplement: Data S1 — Details on each column are provided as comments on the first row. [file peerj-04-1766-s002.xls]

## Sheet: Hoja1
RING	CN	BROOD	FLED	CS	HD	BS	TR	D_Vp-Vm	D_Sm2-Vm	D_Sp-Vm	D_Sp-Sm2	D_HD-Vm	D_Sp-HD	D_Sp-Vp	F_RNG	Fp_IH	TACfp	TPRfp	AURfp	CARfp	IHf	TACf	TPRf	AURf	CARf	F_Ala	F_Ts	F_Pes	TREp	PesVAC	Wing	Tarsus	PES	Sex	IH	TAC	PRT	AUR	CAR	pes1	PH1	pes2	PH2	TIME PHA
2A304748	C14B	1	0	7	44	7	0	392	400	400	0	388	12	8	2A274160	0	1463.75	3.34	11.45	12.6749	0	1848.98	2.33	19.16	30.3704	77	18.22	24.4	1	9.4	.	.	9.4	.	.	.	.	.	.	.	.	.	.	.
2A304749	C14B	1	1	7	44	7	0	392	400	400	0	388	12	8	2A274160	0	1463.75	3.34	11.45	12.6749	0	1848.98	2.33	19.16	30.3704	77	18.22	24.4	1	10.5	53	19.02	22.2	2	.	500	2.51	9.47	35.8025	22.2	0.713333	22.3	1.04	.
2A304750	C14B	1	1	7	44	7	0	392	400	400	0	388	12	8	2A274160	0	1463.75	3.34	11.45	12.6749	0	1848.98	2.33	19.16	30.3704	77	18.22	24.4	2	10.6	54	18.51	23.8	1	0	863.08	1.76	5.98	22.963	23.8	0.766667	23.6	1.06333	37
2A304752	C14B	1	1	7	44	7	0	392	400	400	0	388	12	8	2A274160	0	1463.75	3.34	11.45	12.6749	0	1848.98	2.33	19.16	30.3704	77	18.22	24.4	2	9.6	51	18.27	20.39	2	0	899.97	1.89	4.72	26.0905	20.39	0.616667	20.3	1.29	37
2A304753	C14B	1	1	7	44	7	0	392	400	400	0	388	12	8	2A274160	0	1463.75	3.34	11.45	12.6749	0	1848.98	2.33	19.16	30.3704	77	18.22	24.4	2	9.3	52	18.36	19.6	1	0	387.71	0.37	1.01	10.7819	19.6	0.73	19.8	1.20333	37
2A304754	C14B	1	0	7	44	7	0	392	400	400	0	388	12	8	2A274160	0	1463.75	3.34	11.45	12.6749	0	1848.98	2.33	19.16	30.3704	77	18.22	24.4	1	8.4	.	.	8.4	.	.	.	.	.	.	.	.	.	.	.
2A304755	C37D	2	0	6	45	5	1	27	38	38	0	24	14	11	2A291588	0	1644.73	3.5	14.32	4.19753	0	886.1	3.52	26.56	19.9177	74	18.71	.	1	11.3	.	.	11.3	.	.	.	.	.	.	.	.	.	.	.
2A304756	C37D	2	1	6	45	5	1	27	38	38	0	24	14	11	2A291588	0	1644.73	3.5	14.32	4.19753	0	886.1	3.52	26.56	19.9177	74	18.71	.	2	10.6	61	17.95	21.3	2	0	970.01	2.17	7.65	0	.	.	.	.	.
2A304757	C37D	2	0	6	45	5	1	27	38	38	0	24	14	11	2A291588	0	1644.73	3.5	14.32	4.19753	0	886.1	3.52	26.56	19.9177	74	18.71	.	2	11.4	.	.	11.4	.	.	.	.	.	.	.	.	.	.	.
2A304758	C37D	2	1	6	45	5	1	27	38	38	0	24	14	11	2A291588	0	1644.73	3.5	14.32	4.19753	0	886.1	3.52	26.56	19.9177	74	18.71	.	1	10.2	63	17.82	21.6	2	0	1122.32	1.95	9.4	10.6173	.	.	.	.	.
2A304759	C46	1	1	6	43	6	1	29	37	37	0	24	13	8	2A291582	0	1069.89	4.23	10.11	0	64	549.45	3.7	20.67	13.251	75	18.81	26.7	2	17.6	60	17.72	20.9	1	0	876.46	1.9	5.63	21.3169	20.9	0.456667	.	.	.
2A304760	C46	1	1	6	43	6	1	29	37	37	0	24	13	8	2A291582	0	1069.89	4.23	10.11	0	64	549.45	3.7	20.67	13.251	75	18.81	26.7	1	17.9	48	16.8	19.8	1	0	926.33	1.93	6.22	13.1687	19.8	0.533333	.	.	.
2A304761	C46	1	1	6	43	6	1	29	37	37	0	24	13	8	2A291582	0	1069.89	4.23	10.11	0	64	549.45	3.7	20.67	13.251	75	18.81	26.7	2	19.8	59	17.9	22.4	1	0	1097.63	1.9	4.93	19.2593	22.4	0.48	.	.	.
2A304762	C46	1	1	6	43	6	1	29	37	37	0	24	13	8	2A291582	0	1069.89	4.23	10.11	0	64	549.45	3.7	20.67	13.251	75	18.81	26.7	1	15.9	55.5	16.74	18.2	2	0	1091.16	1.59	5	14.8148	18.2	0.556667	.	.	.
2A304763	C46	1	0	6	43	6	1	29	37	37	0	24	13	8	2A291582	0	1069.89	4.23	10.11	0	64	549.45	3.7	20.67	13.251	75	18.81	26.7	2	12.4	.	16.5	16.9	2	32	500	1.75	4.43	9.0535	16.9	0.396667	.	.	.
2A304764	C46	1	0	6	43	6	1	29	37	37	0	24	13	8	2A291582	0	1069.89	4.23	10.11	0	64	549.45	3.7	20.67	13.251	75	18.81	26.7	1	11.1	.	.	11.1	.	.	.	.	.	.	.	.	.	.	.
2A304769	V46	1	1	5	43	5	0	27	35	35	0	22	13	8	2A291589	0	1155.52	4.02	10.06	11.1111	0	1261.73	3.47	14.44	12.7572	76	18.74	27.8	1	14.2	53	18.1	21.2	2	0	1142.47	2.6	5.72	26.6667	21.2	0.523333	.	.	.
2A304770	V46	1	0	5	43	5	0	27	35	35	0	22	13	8	2A291589	0	1155.52	4.02	10.06	11.1111	0	1261.73	3.47	14.44	12.7572	76	18.74	27.8	2	13.2	.	.	13.2	.	.	.	.	.	.	.	.	.	.	.
2A304771	V46	1	1	5	43	5	0	27	35	35	0	22	13	8	2A291589	0	1155.52	4.02	10.06	11.1111	0	1261.73	3.47	14.44	12.7572	76	18.74	27.8	2	14.7	55	18.51	22.3	1	0	500	3.85	10.14	0	22.3	0.53	.	.	.
2A304772	V46	1	0	5	43	5	0	27	35	35	0	22	13	8	2A291589	0	1155.52	4.02	10.06	11.1111	0	1261.73	3.47	14.44	12.7572	76	18.74	27.8	1	9.3	.	.	9.3	.	.	.	.	.	.	.	.	.	.	.
2A304773	V46	1	0	5	43	5	0	27	35	35	0	22	13	8	2A291589	0	1155.52	4.02	10.06	11.1111	0	1261.73	3.47	14.44	12.7572	76	18.74	27.8	2	6.4	.	.	6.4	.	.	.	.	.	.	.	.	.	.	.
2A304778	C26D	2	1	6	52	6	1	29	31	37	6	24	13	8	2A220806	0	3933.85	2.85	19.42	.	128	1036.59	4.07	23.15	28.0658	75	18.32	26.4	2	17.7	54	18.28	20.4	1	128	500	3.61	4.5	0	20.4	0.556667	.	.	.
2A304779	C26D	2	1	6	52	6	1	29	31	37	6	24	13	8	2A220806	0	3933.85	2.85	19.42	.	128	1036.59	4.07	23.15	28.0658	75	18.32	26.4	2	15.6	57	18.53	21.2	1	32	256.04	4.3	11.35	0	21.2	0.486667	.	.	.
2A304780	C26D	2	1	6	52	6	1	29	31	37	6	24	13	8	2A220806	0	3933.85	2.85	19.42	.	128	1036.59	4.07	23.15	28.0658	75	18.32	26.4	1	14.9	52	17.86	19.2	2	0	626.39	2.33	5.91	10.3704	19.2	0.456667	.	.	.
2A304781	C26D	2	1	6	52	6	1	29	31	37	6	24	13	8	2A220806	0	3933.85	2.85	19.42	.	128	1036.59	4.07	23.15	28.0658	75	18.32	26.4	1	14.6	55	18.29	19.3	2	0	500	2.47	6.78	9.38272	19.3	0.45	.	.	.
2A304782	C26D	2	0	6	52	6	1	29	31	37	6	24	13	8	2A220806	0	3933.85	2.85	19.42	.	128	1036.59	4.07	23.15	28.0658	75	18.32	26.4	2	10.7	.	.	10.7	.	.	.	.	.	.	.	.	.	.	.
2A304783	G18B	2	1	6	53	6	0	.	.	.	6	.	12	8	2A304800	.	.	.	.	.	0	1361.67	2.43	14.32	15.0617	77	18.74	.	1	15.6	57	18.07	21.8	1	0	940.21	2.53	5.38	.	21.8	0.506667	.	.	.
2A304784	G18B	2	1	6	53	6	0	.	.	.	6	.	12	8	2A304800	.	.	.	.	.	0	1361.67	2.43	14.32	15.0617	77	18.74	.	2	15.2	57	17.44	21.2	1	0	784.38	1.85	7.12	19.3416	21.2	0.526667	.	.	.
2A304785	G18B	2	1	6	53	6	0	.	.	.	6	.	12	8	2A304800	.	.	.	.	.	0	1361.67	2.43	14.32	15.0617	77	18.74	.	1	16.4	57	17.31	21.6	2	0	826.73	2.13	6.71	21.6461	21.6	0.523333	.	.	.
2A304786	G18B	2	1	6	53	6	0	.	.	.	6	.	12	8	2A304800	.	.	.	.	.	0	1361.67	2.43	14.32	15.0617	77	18.74	.	1	11	50	15.47	18.7	2	0	829.42	1.83	4.66	21.6461	18.7	0.513333	.	.	.
2A304787	G18B	2	1	6	53	6	0	.	.	.	6	.	12	8	2A304800	.	.	.	.	.	0	1361.67	2.43	14.32	15.0617	77	18.74	.	2	18.1	59	18.09	23.3	2	0	500	1.89	6.93	15.7202	23.3	0.516667	.	.	.
2A304788	G18B	2	1	6	53	6	0	.	.	.	6	.	12	8	2A304800	.	.	.	.	.	0	1361.67	2.43	14.32	15.0617	77	18.74	.	2	16.3	57	17.66	21.4	2	0	254.55	2.35	5.84	.	21.4	0.603333	.	.	.
2A304794	C37D	2	1	6	45	5	1	27	38	38	0	24	14	11	2A291588	0	1644.73	3.5	14.32	4.19753	0	886.1	3.52	26.56	19.9177	74	18.71	.	2	6.3	54	16.81	19.1	2	0	1277.18	1.92	8.67	37.1193	.	.	.	.	.
2A304801	C48	2	1	5	59	4	1	29	32	39	7	27	12	10	2A291612	0	3932.69	2.88	26	.	16	1496.9	2.4	8.95	8.72428	75.5	17.9	26.4	2	9.6	50	17.45	19.3	1	.	.	.	.	.	19.3	0.53	20.6	2.21667	.
2A304802	C48	2	1	5	59	4	1	29	32	39	7	27	12	10	2A291612	0	3932.69	2.88	26	.	16	1496.9	2.4	8.95	8.72428	75.5	17.9	26.4	1	9.8	57	18.95	22.2	1	0	1164.7	2.59	8.88	.	22.2	0.55	.	.	.
2A304803	C48	2	1	5	59	4	1	29	32	39	7	27	12	10	2A291612	0	3932.69	2.88	26	.	16	1496.9	2.4	8.95	8.72428	75.5	17.9	26.4	2	10.7	57.5	17.78	20.2	2	0	2224.37	2.7	9.2	19.3416	20.2	0.553333	.	.	.
2A304808	V26C	2	0	6	59	5	1	29	32	39	7	27	12	10	2A291599	0	500	0	0.05	.	32	1531.7	2.82	13.61	0	76	19	27.2	2	10.9	.	.	10.9	.	.	.	.	.	.	.	.	.	.	.
2A304809	V26C	2	0	6	59	5	1	29	32	39	7	27	12	10	2A291599	0	500	0	0.05	.	32	1531.7	2.82	13.61	0	76	19	27.2	2	6.4	.	.	6.4	.	.	.	.	.	.	.	.	.	.	.
2A304810	V26C	2	1	6	59	5	1	29	32	39	7	27	12	10	2A291599	0	500	0	0.05	.	32	1531.7	2.82	13.61	0	76	19	27.2	1	8.4	54	17.3	21.7	1	0	1385.11	2.72	10.66	10.0412	21.7	0.576667	.	.	.
2A304811	V26C	2	0	6	59	5	1	29	32	39	7	27	12	10	2A291599	0	500	0	0.05	.	32	1531.7	2.82	13.61	0	76	19	27.2	1	5.3	.	.	5.3	.	.	.	.	.	.	.	.	.	.	.
2A304814	V16C	2	1	5	59	4	0	.	.	.	7	.	12	10	2A304823	.	.	.	.	.	0	1416.29	1.93	11.85	12.0165	73	17.19	24.2	2	9.8	55	17.24	22.4	1	0	923.28	2.18	7.38	11.1934	22.4	0.47	21.6	1.53667	44
2A304815	V16C	2	1	5	59	4	0	.	.	.	7	.	12	10	2A304823	.	.	.	.	.	0	1416.29	1.93	11.85	12.0165	73	17.19	24.2	2	8.8	54	16.78	20.9	1	128	1364.25	2.06	10.28	9.0535	20.9	0.52	21.4	1.98333	44
2A304816	V16C	2	1	5	59	4	0	.	.	.	7	.	12	10	2A304823	.	.	.	.	.	0	1416.29	1.93	11.85	12.0165	73	17.19	24.2	1	8.6	54	17.68	22.1	1	0	1759.63	2.2	8.2	20.4938	22.1	0.596667	22.3	1.3	44
2A304817	V16C	2	1	5	59	4	0	.	.	.	7	.	12	10	2A304823	.	.	.	.	.	0	1416.29	1.93	11.85	12.0165	73	17.19	24.2	1	9.4	54	17.38	21.9	1	0	979.14	2.15	4.69	27.2428	21.9	0.476667	22.4	1.76	44
2A304824	C19B	2	1	7	61	4	0	401	407	407	0	397	10	6	2A220939	.	.	.	.	.	0	1045.52	2.88	16.96	5.92593	74	18	24.2	1	13.2	50	18.42	19.4	1	0	1230.85	1.56	7.79	.	19.4	0.596667	21.2	1.89333	25
2A304825	C19B	2	1	7	61	4	0	401	407	407	0	397	10	6	2A220939	.	.	.	.	.	0	1045.52	2.88	16.96	5.92593	74	18	24.2	2	13.6	49	17.84	19.7	2	0	500	1.71	6.15	18.2716	19.7	0.68	22.4	1.45667	25
2A304826	C19B	2	1	7	61	4	0	401	407	407	0	397	10	6	2A220939	.	.	.	.	.	0	1045.52	2.88	16.96	5.92593	74	18	24.2	2	11.2	49	17.78	18.3	2	0	1066.31	1.49	6.6	10.6173	18.3	0.586667	19.7	1.98	25
2A304827	C19B	2	1	7	61	4	0	401	407	407	0	397	10	6	2A220939	.	.	.	.	.	0	1045.52	2.88	16.96	5.92593	74	18	24.2	1	10.4	47	17.9	18.4	2	0	1050.56	1.13	5.71	8.80658	18.4	0.566667	19.6	2.15333	25
2A304831	C29C	2	1	6	64	6	0	.	.	.	3	.	11	7	A2811945	.	.	.	.	.	0	.	.	.	.	77	18.74	27.6	2	11.6	50	18.21	23.4	1	0	473.51	2.02	3.09	.	23.4	0.676667	22.7	1.28667	44
2A304832	C29C	2	1	6	64	6	0	.	.	.	3	.	11	7	A2811945	.	.	.	.	.	0	.	.	.	.	77	18.74	27.6	2	10.6	48	18.25	22.8	1	0	1623.53	3.26	10.49	32.8395	22.8	0.69	23.2	1.15667	44
2A304833	C29C	2	1	6	64	6	0	.	.	.	3	.	11	7	A2811945	.	.	.	.	.	0	.	.	.	.	77	18.74	27.6	2	9.9	.	.	.	.	.	.	.	.	.	.	.	.	.	.
2A304834	C29C	2	1	6	64	6	0	.	.	.	3	.	11	7	A2811945	.	.	.	.	.	0	.	.	.	.	77	18.74	27.6	2	12.4	.	.	.	.	.	.	.	.	.	.	.	.	.	.
2A304835	C29C	2	1	6	64	6	0	.	.	.	3	.	11	7	A2811945	.	.	.	.	.	0	.	.	.	.	77	18.74	27.6	1	12.2	51	18.13	22	1	0	1112.19	1.83	5.19	10.8642	22	0.666667	21.4	1.02	44
2A304836	C9B	2	1	5	65	5	0	32	39	43	4	29	14	11	2A291635	0	1928.46	3.89	20.58	23.0453	0	500	4.41	19.44	0	76	17.74	24.5	1	9.5	63	18.73	21.3	1	0	1502.77	2.34	12.44	15.2263	21.3	0.473333	.	.	.
2A304837	C9B	2	0	5	65	5	0	32	39	43	4	29	14	11	2A291635	0	1928.46	3.89	20.58	23.0453	0	500	4.41	19.44	0	76	17.74	24.5	2	9.4	.	.	9.4	.	.	.	.	.	.	.	.	.	.	.
2A304838	C9B	2	1	5	65	5	0	32	39	43	4	29	14	11	2A291635	0	1928.46	3.89	20.58	23.0453	0	500	4.41	19.44	0	76	17.74	24.5	2	10.4	61	18.13	21.3	2	0	1205.96	2.06	8.59	13.3333	21.3	0.53	.	.	.
2A304839	C9B	2	1	5	65	5	0	32	39	43	4	29	14	11	2A291635	0	1928.46	3.89	20.58	23.0453	0	500	4.41	19.44	0	76	17.74	24.5	1	8.3	60	18.56	19.9	2	0	1970.72	2.4	14.37	11.963	19.9	0.516667	.	.	.
2A304840	G19	2	1	6	62	5	1	179	179	186	7	173	13	7	2A291566	.	.	.	.	.	.	500	1.11	0.21	2.96296	74	18.89	26.8	2	9.7	48	17.09	19	1	0	956.83	2.11	5.7	18.6008	19	0.616667	20.6	0.876667	43
2A304841	G19	2	1	6	62	5	1	179	179	186	7	173	13	7	2A291566	.	.	.	.	.	.	500	1.11	0.21	2.96296	74	18.89	26.8	2	15.9	56	17.7	20.6	1	0	1415.68	2.48	9.87	9.30041	20.6	0.61	21.7	1.13333	43
2A304842	G19	2	1	6	62	5	1	179	179	186	7	173	13	7	2A291566	.	.	.	.	.	.	500	1.11	0.21	2.96296	74	18.89	26.8	1	14.7	54	17.62	17.6	2	0	1384.17	2.38	10.4	.	17.6	0.48	19	1.21667	43
2A304843	G19	2	1	6	62	5	1	179	179	186	7	173	13	7	2A291566	.	.	.	.	.	.	500	1.11	0.21	2.96296	74	18.89	26.8	1	13.2	53	17.77	19.2	1	64	969.99	2.14	4.42	0	19.2	0.533333	19.9	1.38667	43
2A304844	G19	2	1	6	62	5	1	179	179	186	7	173	13	7	2A291566	.	.	.	.	.	.	500	1.11	0.21	2.96296	74	18.89	26.8	2	14.3	55	17.65	19.4	2	0	1195.2	2.94	8.36	16.3025	19.4	0.6	20.7	1.31333	43
2A304845	V48B	2	.	6	61	.	0	.	.	.	7	.	14	7	2A304850	.	.	.	.	.	0	658.8	3	4.06	0	75	16.34	26.6	2	9.4	43	15.28	13.1	2	0	1190.8	2.04	10.12	6.66667	13.1	0.46	.	.	.
2A304846	V48B	2	.	6	61	.	0	.	.	.	7	.	14	7	2A304850	.	.	.	.	.	0	658.8	3	4.06	0	75	16.34	26.6	2	13.9	55	17.22	19.4	1	0	1399.08	2.51	10.06	16.7078	19.4	0.55	22.1	1.17667	44
2A304847	V48B	2	.	6	61	.	0	.	.	.	7	.	14	7	2A304850	.	.	.	.	.	0	658.8	3	4.06	0	75	16.34	26.6	1	8.7	42	14.16	13.7	2	0	972.01	1.7	5.3	.	13.7	0.56	16.2	1.52667	44
2A304848	V48B	2	.	6	61	.	0	.	.	.	7	.	14	7	2A304850	.	.	.	.	.	0	658.8	3	4.06	0	75	16.34	26.6	1	10.3	50	15.65	14.6	2	0	62.5	1.61	8.36	.	14.6	0.543333	16.1	1.57333	44
2A304851	V39B	2	1	6	64	5	1	36	39	43	4	32	11	7	2A291611	0	1000.95	2.13	32.81	14.0741	.	868.81	3.47	12.74	0	77	19	29.2	1	10	46	17.22	14.4	2	0	1019.85	1.73	6.86	.	14.4	0.46	15.2	1.38667	44
2A304852	V39B	2	1	6	64	5	1	36	39	43	4	32	11	7	2A291611	0	1000.95	2.13	32.81	14.0741	.	868.81	3.47	12.74	0	77	19	29.2	2	20.3	59	18.94	21.5	1	0	500	2.53	7.61	19.8354	21.5	0.553333	.	.	.
2A304853	V39B	2	1	6	64	5	1	36	39	43	4	32	11	7	2A291611	0	1000.95	2.13	32.81	14.0741	.	868.81	3.47	12.74	0	77	19	29.2	2	13.2	49	17.36	17.4	2	0	1042.14	1.44	5.62	11.0288	17.4	0.53	18.7	1.41333	44
2A304854	V39B	2	1	6	64	5	1	36	39	43	4	32	11	7	2A291611	0	1000.95	2.13	32.81	14.0741	.	868.81	3.47	12.74	0	77	19	29.2	1	19.2	58	18.97	20.9	2	0	1117.98	2.33	7.65	18.4362	20.9	0.536667	20.7	1.03	44
2A304855	C23C	2	0	6	66	3	1	34	32	.	.	30	.	.	2A220986	0	1188.55	3.56	9.67	10.535	32	1524.69	3.45	22.58	0	73.5	19.18	26.2	2	9.2	.	.	9.2	.	.	.	.	.	.	.	.	.	.	.
2A304856	C23C	2	0	6	66	3	1	34	32	.	.	30	.	.	2A220986	0	1188.55	3.56	9.67	10.535	32	1524.69	3.45	22.58	0	73.5	19.18	26.2	1	6.7	.	.	6.7	.	.	.	.	.	.	.	.	.	.	.
2A304859	C48	2	1	5	59	4	1	29	32	39	7	27	12	10	2A291612	0	3932.69	2.88	26	.	16	1496.9	2.4	8.95	8.72428	75.5	17.9	26.4	1	5.7	57	17.54	18.1	2	0	1107.86	2.02	7.2	0	18.1	0.5	18.1	1.38	43
2A304862	V31B	2	1	6	69	6	0	.	.	.	4	.	10	7	2A312215	.	.	.	.	.	0	1299.79	2.96	10.69	0	76	18.41	25.9	1	7.7	41	16.56	19.2	2	0	648.25	3.06	13.78	.	19.2	0.75	19.4	0.933333	41
2A304863	V31B	2	1	6	69	6	0	.	.	.	4	.	10	7	2A312215	.	.	.	.	.	0	1299.79	2.96	10.69	0	76	18.41	25.9	2	8.9	46	17.86	20.9	1	0	500	1.15	8.98	18.5185	20.9	0.733333	21.4	1.00333	41
2A304865	V31B	2	1	6	69	6	0	.	.	.	4	.	10	7	2A312215	.	.	.	.	.	0	1299.79	2.96	10.69	0	76	18.41	25.9	1	6.6	38	16.51	18.6	1	0	958.49	1.7	3.63	19.5062	18.6	0.756667	18.4	1.50667	41
2A304870	V37B	2	1	7	68	6	1	33	40	42	2	29	13	9	2A291674	64	1544.82	2.48	16.04	.	16	1518.08	2.92	11.04	8.72428	76	18.27	25.4	2	8.6	48	16.61	15.6	2	0	1073.54	2	5.88	11.1934	15.6	0.516667	20.2	0.856667	45
2A304872	V37B	2	1	7	68	6	1	33	40	42	2	29	13	9	2A291674	64	1544.82	2.48	16.04	.	16	1518.08	2.92	11.04	8.72428	76	18.27	25.4	1	8.5	49	17.73	17.3	2	0	500	0.4	0.17	13.5802	17.3	0.56	21.3	0.776667	45
2A304873	V37B	2	1	7	68	6	1	33	40	42	2	29	13	9	2A291674	64	1544.82	2.48	16.04	.	16	1518.08	2.92	11.04	8.72428	76	18.27	25.4	2	6.8	46	16.24	16.3	1	0	895.08	2	4.84	0	16.3	0.563333	19.3	0.813333	45
2A304879	V50B	2	1	6	68	6	0	33	36	45	.	29	16	12	2A291676	0	1188.14	3.68	14.35	.	0	368.52	3.49	8.61	.	77	18.04	26.3	2	6.1	.	.	6.1	.	.	.	.	.	.	.	.	.	.	.
2A304880	V50B	2	1	6	68	6	0	33	36	45	9	29	16	12	2A291676	0	1188.14	3.68	14.35	.	0	368.52	3.49	8.61	.	77	18.04	26.3	1	9.8	62	16.27	17.9	1	32	500	3.13	5.51	6.58436	17.9	0.453333	.	.	.
2A304881	V50B	2	1	6	68	6	0	33	36	45	.	29	16	12	2A291676	0	1188.14	3.68	14.35	.	0	368.52	3.49	8.61	.	77	18.04	26.3	2	7.1	.	.	7.1	.	.	.	.	.	.	.	.	.	.	.
2A304882	V50B	2	1	6	68	6	0	33	36	45	.	29	16	12	2A291676	0	1188.14	3.68	14.35	.	0	368.52	3.49	8.61	.	77	18.04	26.3	1	6.9	.	.	6.9	.	.	.	.	.	.	.	.	.	.	.
2A304883	V50B	2	1	6	68	6	0	33	36	45	9	29	16	12	2A291676	0	1188.14	3.68	14.35	.	0	368.52	3.49	8.61	.	77	18.04	26.3	2	9.9	62	17.73	19.4	2	32	500	2.81	3.12	.	19.4	0.46	.	.	.
2A304887	G24	2	1	5	68	4	1	37	43	45	2	32	13	8	2A291650	0	500	3.31	14.68	48.3128	64	701.06	3.29	16.07	11.5226	75	18.75	26.3	2	13.7	58	18.08	21.2	2	0	1273.7	2.82	12.39	.	21.2	0.56	.	.	.
2A304888	G24	2	0	5	68	4	1	37	43	45	2	32	13	8	2A291650	0	500	3.31	14.68	48.3128	64	701.06	3.29	16.07	11.5226	75	18.75	26.3	1	12.1	.	.	.	.	.	.	.	.	.	.	.	.	.	.
2A304889	G24	2	1	5	68	4	1	37	43	45	2	32	13	8	2A291650	0	500	3.31	14.68	48.3128	64	701.06	3.29	16.07	11.5226	75	18.75	26.3	1	10	51	17.93	21.3	2	0	1516.5	2.46	10.93	0	21.3	0.54	.	.	.
2A304890	G24	2	1	5	68	4	1	37	43	45	2	32	13	8	2A291650	0	500	3.31	14.68	48.3128	64	701.06	3.29	16.07	11.5226	75	18.75	26.3	2	11.6	54	17.24	22.7	2	0	1533.5	2.12	5.26	15.6379	22.7	0.91	.	.	.
2A304891	G28C	2	1	6	69	6	0	37	39	43	4	33	10	6	2A274279	0	.	.	.	.	0	1083.09	3.31	15.6	0	74	18.08	28	1	11	36	16.08	14.2	1	0	918.46	1.72	4.99	0	14.2	0.646667	14.4	1.42667	40
2A304892	G28C	2	1	6	69	6	0	37	39	43	4	33	10	6	2A274279	0	.	.	.	.	0	1083.09	3.31	15.6	0	74	18.08	28	2	14.2	46	17.36	21.6	1	0	847.95	1.73	2.27	8.23045	21.6	0.77	22.2	0.876667	40
2A304893	G28C	2	1	6	69	6	0	37	39	43	4	33	10	6	2A274279	0	.	.	.	.	0	1083.09	3.31	15.6	0	74	18.08	28	2	11.4	39	16.39	15.7	2	0	1151.78	1.92	4.31	15.3909	15.7	0.65	17.6	0.98	40
2A304894	G28C	2	1	6	69	6	0	37	39	43	4	33	10	6	2A274279	0	.	.	.	.	0	1083.09	3.31	15.6	0	74	18.08	28	1	12.6	47	17.71	19.3	2	0	982.16	1.68	5.27	7.2428	19.3	0.673333	19.7	0.916667	40
2A304895	G28C	2	1	6	69	6	0	37	39	43	4	33	10	6	2A274279	0	.	.	.	.	0	1083.09	3.31	15.6	0	74	18.08	28	1	8.1	32	16.06	14.4	2	0	989.96	1.56	3.54	16.2963	14.4	0.636667	15.4	1.33667	40
2A304896	G28C	2	1	6	69	6	0	37	39	43	4	33	10	6	2A274279	0	.	.	.	.	0	1083.09	3.31	15.6	0	74	18.08	28	2	10.2	42	17.75	18.7	2	0	1272.28	1.49	10.44	.	18.7	0.756667	20.5	1.97	40
2A312212	V44B	2	0	4	69	2	0	.	.	.	.	.	.	.	2A312214	.	.	.	.	.	16	500	2.4	4.38	27.8189	74	19.89	26.7	1	9.2	.	.	9.2	.	.	.	.	.	.	.	.	.	.	.
2A312213	V44B	2	0	4	69	2	0	.	.	.	.	.	.	.	2A312214	.	.	.	.	.	16	500	2.4	4.38	27.8189	74	19.89	26.7	2	10.6	.	.	10.6	.	.	.	.	.	.	.	.	.	.	.
2A312235	V31B	2	0	6	69	6	0	.	.	.	4	.	10	7	2A312215	.	.	.	.	.	0	1299.79	2.96	10.69	0	76	18.41	25.9	2	6.4	26	14.41	9.7	2	.	.	.	.	.	9.7	0.57	.	.	.
2A312236	V31B	2	1	6	69	6	0	.	.	.	4	.	10	7	2A312215	.	.	.	.	.	0	1299.79	2.96	10.69	0	76	18.41	25.9	2	6.8	38	16.84	17.6	2	0	1159.86	1.66	3.85	25.679	17.6	0.606667	17.6	1.04667	41
2A312239	C20C	3	1	4	74	3	0	.	.	.	7	.	12	5	2A312238	.	.	.	.	.	0	1578.23	3.39	13.5	.	74	18.93	26.7	2	17.4	50	19.06	21.3	2	256	500	3.43	5.16	0	21.3	0.596667	.	.	.
2A312240	C20C	3	1	4	74	3	0	.	.	.	7	.	12	5	2A312238	.	.	.	.	.	0	1578.23	3.39	13.5	.	74	18.93	26.7	1	19.4	57	18.62	23	1	32	556.55	5.39	6.84	0	23	0.543333	.	.	.
2A312241	C20C	3	1	4	74	3	0	.	.	.	7	.	12	5	2A312238	.	.	.	.	.	0	1578.23	3.39	13.5	.	74	18.93	26.7	2	20.9	56	18.92	21.3	1	32	500	3.84	10.96	12.5926	21.3	0.536667	.	.	.
2A312253	C5E	2	1	6	73	4	1	42	42	47	5	34	13	5	2A291651	0	2152.75	3	19.38	56.9547	64	.	.	.	.	75	18.83	23.3	2	17.6	52	17.94	18.2	2	0	785.9	1.84	5.57	0	18.2	0.486667	.	.	.
2A312254	C5E	2	1	6	73	4	1	42	42	47	5	34	13	5	2A291651	0	2152.75	3	19.38	56.9547	64	.	.	.	.	75	18.83	23.3	2	15.2	49	18.03	18.3	1	128	500	2.69	2.94	0	18.3	0.556667	.	.	.
2A312255	C5E	2	1	6	73	4	1	42	42	47	5	34	13	5	2A291651	0	2152.75	3	19.38	56.9547	64	.	.	.	.	75	18.83	23.3	1	17.2	54	18.1	20	2	0	795.23	2.42	5.98	4.60905	20	0.576667	.	.	.
2A312256	C5E	2	1	6	73	4	1	42	42	47	5	34	13	5	2A291651	0	2152.75	3	19.38	56.9547	64	.	.	.	.	75	18.83	23.3	1	13.1	45	18.42	17.8	1	0	500	2.03	6.86	6.99588	17.8	0.58	.	.	.
2A312257	C10E	3	1	5	75	4	1	62	65	67	2	56	11	5	2A291581	0	981.42	3.14	10.14	7.73663	32	1113.16	2.11	11.9	1.97531	76.5	18.22	24.5	2	16.7	51	18.45	21.1	1	0	723.87	2.31	3.94	.	21.1	0.616667	.	.	.
2A312258	C10E	3	1	5	75	4	1	62	65	67	2	56	11	5	2A291581	0	981.42	3.14	10.14	7.73663	32	1113.16	2.11	11.9	1.97531	76.5	18.22	24.5	1	10.3	42	17.81	19.4	2	0	656.86	2.37	6.87	20.4938	19.4	0.65	.	.	.
2A312259	C10E	3	1	5	75	4	1	62	65	67	2	56	11	5	2A291581	0	981.42	3.14	10.14	7.73663	32	1113.16	2.11	11.9	1.97531	76.5	18.22	24.5	1	16.4	49	17.77	20.2	2	0	631.72	2.26	4.56	21.3169	20.2	0.64	.	.	.
2A312260	C10E	3	1	5	75	4	1	62	65	67	2	56	11	5	2A291581	0	981.42	3.14	10.14	7.73663	32	1113.16	2.11	11.9	1.97531	76.5	18.22	24.5	2	14.4	49	18.95	21.2	1	0	800.92	2.16	3.75	23.5391	21.2	0.663333	.	.	.
2A312261	V37B	2	1	7	68	6	1	33	40	42	2	29	13	9	2A291674	64	1544.82	2.48	16.04	.	16	1518.08	2.92	11.04	8.72428	76	18.27	25.4	1	6.4	42	14.68	14.5	2	0	1224.74	1.78	4.64	12.2634	14.5	0.536667	16.9	0.84	45
2A312262	V37B	2	0	7	68	6	1	33	40	42	2	29	13	9	2A291674	64	1544.82	2.48	16.04	.	16	1518.08	2.92	11.04	8.72428	76	18.27	25.4	2	5.6	41	15.33	12.7	1	32	.	.	.	.	12.7	0.563333	.	.	.
NR_C14	C14B	1	0	7	44	7	0	392	400	400	0	388	12	8	2A274160	0	1463.75	3.34	11.45	12.6749	0	1848.98	2.33	19.16	30.3704	77	18.22	24.4	2	5.9	.	.	5.9	.	.	.	.	.	.	.	.	.	.	.
NR_C23	C23C	2	0	6	66	3	1	34	32	.	.	30	.	.	2A220986	0	1188.55	3.56	9.67	10.535	32	1524.69	3.45	22.58	0	73.5	19.18	26.2	2	2.6	.	.	2.6	.	.	.	.	.	.	.	.	.	.	.
NR_C26	C26D	2	0	6	52	6	1	29	31	37	6	24	13	8	2A220806	0	3933.85	2.85	19.42	.	128	1036.59	4.07	23.15	28.0658	75	18.32	26.4	1	4.7	.	.	4.7	.	.	.	.	.	.	.	.	.	.	.
NR_C29C	C29C	2	0	6	64	6	0	.	.	.	3	.	11	7	A2811945	.	.	.	.	.	0	.	.	.	.	77	18.74	27.6	1	4.1	.	.	.	.	.	.	.	.	.	.	.	.	.	.
NR_C9	C9B	2	0	5	65	5	0	32	39	43	4	29	14	11	2A291635	0	1928.46	3.89	20.58	23.0453	0	500	4.41	19.44	0	76	17.74	24.5	2	3.3	.	.	3.3	.	.	.	.	.	.	.	.	.	.	.
NR_V26	V26C	2	0	6	59	5	1	29	32	39	7	27	12	10	2A291599	0	500	0	0.05	.	32	1531.7	2.82	13.61	0	76	19	27.2	2	5.1	.	.	5.1	.	.	.	.	.	.	.	.	.	.	.
NR_V31	V31B	2	0	6	69	6	0	.	.	.	4	.	10	7	2A312215	.	.	.	.	.	0	1299.79	2.96	10.69	0	76	18.41	25.9	1	3.9	.	.	3.9	.	.	.	.	.	.	.	.	.	.	.
NR_V50	V50B	2	0	6	68	6	0	33	36	45	.	29	16	12	2A291676	0	1188.14	3.68	14.35	.	0	368.52	3.49	8.61	.	77	18.04	26.3	1	3.5	.	.	3.5	.	.	.	.	.	.	.	.	.	.	.

## Sheet: Hoja2
RING	CN	TIME PHA
2A304750	C14B	37
2A304752	C14B	37
2A304753	C14B	37
2A304756	C37D
2A304758	C37D
2A304759	C46
2A304760	C46
2A304761	C46
2A304762	C46
2A304763	C46
2A304769	V46
2A304771	V46
2A304778	C26D
2A304779	C26D
2A304780	C26D
2A304781	C26D
2A304783	G18B
2A304784	G18B
2A304785	G18B
2A304786	G18B
2A304787	G18B
2A304788	G18B
2A304794	C37D
2A304802	C48
2A304803	C48
2A304810	V26C
2A304814	V16C	44
2A304815	V16C	44
2A304816	V16C	44
2A304817	V16C	44
2A304824	C19B	25
2A304825	C19B	25
2A304826	C19B	25
2A304827	C19B	25
2A304831	C29C	44
2A304832	C29C	44
2A304835	C29C	44
2A304836	C9B
2A304838	C9B
2A304839	C9B
2A304840	G19	43
2A304841	G19	43
2A304842	G19	43
2A304843	G19	43
2A304844	G19	43
2A304845	V48B
2A304846	V48B	44
2A304847	V48B	44
2A304848	V48B	44
2A304851	V39B	44
2A304852	V39B
2A304853	V39B	44
2A304854	V39B	44
2A304859	C48	43
2A304862	V31B	41
2A304863	V31B	41
2A304865	V31B	41
2A304870	V37B	45
2A304872	V37B	45
2A304873	V37B	45
2A304880	V50B
2A304883	V50B
2A304887	G24
2A304889	G24
2A304890	G24
2A304891	G28C	40
2A304892	G28C	40
2A304893	G28C	40
2A304894	G28C	40
2A304895	G28C	40
2A304896	G28C	40
2A312236	V31B	41
2A312239	C20C
2A312240	C20C
2A312241	C20C
2A312253	C5E
2A312254	C5E
2A312255	C5E
2A312256	C5E
2A312257	C10E
2A312258	C10E
2A312259	C10E
2A312260	C10E
2A312261	V37B	45
2A312262	V37B
